# Supplementary material
Source: PubMed Central journal article supplement (PMC5074633)
Supplement: supp_pp.16.00881_PP2016-00881DR1_Supplemental_Materialtbls.pdf [file supp_pp.16.00881_PP2016-00881DR1_Supplemental_Materialtbls.pdf]

## Supplemental table S1 – Laxa et al.

**Supplemental table I.** Diurnal expression of the individual transformation events used to generate the data in Figure 2D, 3D and 5. The table summarizes the relative mRNA *gusA* transcript levels 1h and 7h after illumination. Additionally, the ratio between 1h and 7h indicates the decrease of *gusA* transcript throughout the day reflecting the endogenous diurnal behavior of *GGT1*.

| Figure 2D      |          |         |             |
|----------------|----------|---------|-------------|
| Line           | 1h       | 7h      | Ratio 1h:7h |
| <i>GGT1</i> -1 | 7381.42  | 1432.13 | 5.15        |
| <i>GGT1</i> -2 | 1885.53  | 308.21  | 6.12        |
| <i>GGT1</i> -3 | 4322.97  | 2828.71 | 1.53        |
| <i>GGT1</i> -4 | 13327.16 | 3198.18 | 4.17        |
| <i>GGT1</i> -5 | 2891.19  | 1608.25 | 1.80        |
| <i>GGT1</i> -6 | 4661.64  | 3003.14 | 1.55        |
| <i>GGT1</i> -7 | 5270.45  | 1015.82 | 5.19        |
| <i>GGT1</i> -8 | 8419.68  | 5360.64 | 1.57        |
| -1122-1        | 4904.38  | 866.04  | 5.66        |
| -1122-2        | 10805.33 | 3390.72 | 3.19        |
| -1122-3        | 7990.88  | 2537.05 | 3.15        |
| -1122-4        | 16325.01 | 2997.57 | 5.45        |
| -1122-5        | 9813.33  | 5983.80 | 1.64        |
| -1122-6        | 3892.76  | 406.68  | 9.57        |
| -1122-7        | 1521.92  | 283.72  | 5.36        |
| -1122-8        | 12755.77 | 3330.24 | 3.83        |
| -684-1         | 6079.50  | 1654.54 | 3.67        |
| -684-2         | 1454.54  | 469.40  | 3.10        |
| -684-3         | 2020.74  | 248.72  | 8.12        |
| -684-4         | 8405.23  | 1531.47 | 5.49        |
| -684-5         | 10981.16 | 4191.67 | 2.62        |
| -684-6         | 8802.29  | 740.97  | 11.88       |
| -684-7         | 4055.72  | 1539.70 | 2.63        |
| -684-8         | 5777.80  | 2243.63 | 2.58        |
| -684-9         | 1526.53  | 959.30  | 1.59        |
| -684-10        | 11437.66 | 4054.88 | 2.82        |
| -157-1         | 1232.47  | 689.70  | 1.79        |
| -157-2         | 4613.22  | 1299.17 | 3.55        |
| -157-3         | 559.30   | 77.97   | 7.17        |
| -157-4         | 13605.56 | 1218.32 | 11.17       |
| -157-5         | 2348.68  | 2191.23 | 1.07        |
| -157-6         | 9564.45  | 4138.74 | 2.31        |
| -157-7         | 11642.15 | 1477.81 | 7.88        |
| -157-8         | 7452.24  | 1660.24 | 4.49        |
| -157-9         | 9548.04  | 1259.44 | 7.58        |
| -157-10        | 3094.02  | 1434.99 | 2.16        |

Figure 3D

| Line       | 1h       | 7h       | Ratio 1h:7h |
|------------|----------|----------|-------------|
| GGT1-1     | 11250.99 | 2089.41  | 5.38        |
| GGT1-2     | 6750.08  | 12545.02 | 0.54        |
| GGT1-3     | 3071.11  | 799.25   | 3.84        |
| GGT1-4     | 2019.54  | 181.70   | 11.11       |
| GGT1-5     | 11887.34 | 2605.71  | 4.56        |
| GGT1-6     | 1180.61  | 225.61   | 5.23        |
| GGT1-7     | 15726.83 | 4111.26  | 3.83        |
| GGT1-8     | 16228.31 | 2812.77  | 5.77        |
| GGT1-9     | 4793.84  | 2962.11  | 1.62        |
| GGT1-Δ5I-1 | 9808.88  | 2069.69  | 4.74        |
| GGT1-Δ5I-2 | 2.70     | 16.07    | 0.17        |
| GGT1-Δ5I-3 | 0.00     | 0.00     |             |
| GGT1-Δ5I-4 | 1.56     | 0.22     | 7.18        |
| GGT1-Δ5I-5 | 2491.90  | 664.83   | 3.75        |
| GGT1-Δ5I-6 | 2.85     | 0.00     |             |
| GGT1-Δ5I-7 | 3.48     | 1.18     | 2.95        |
| GGT1-Δ5I-8 | 0.44     | 0.75     | 0.58        |
| GGT1-Δ5I-9 | 1849.38  | 659.05   | 2.81        |

Figure 5A and B

| Line        | 1h       | 7h      | Ratio 1h:7h |
|-------------|----------|---------|-------------|
| GGT1-1      | 21211.40 | 9939.05 | 2.13        |
| GGT1-2      | 2281.58  | 3004.49 | 0.76        |
| GGT1-3      | 10838.56 | 8599.98 | 1.26        |
| GGT1-4      | 6176.47  | 1244.05 | 4.96        |
| GGT1-5      | 11070.28 | 3023.53 | 3.66        |
| GGT1-6      | 8140.45  | 998.59  | 8.15        |
| GGT1-7      | 2507.03  | 1390.08 | 1.80        |
| GGT1-8      | 5985.21  | 1182.72 | 5.06        |
| GGT1-9      | 3437.55  | 479.01  | 7.18        |
| GGT1-10     | 1001.86  | 1425.96 | 0.70        |
| GGT1-Δ5I-1  | 6084.68  | 2363.96 | 2.57        |
| GGT1-Δ5I-2  | 7983.21  | 4678.77 | 1.71        |
| GGT1-Δ5I-3  | 7475.36  | 3760.27 | 1.99        |
| GGT1-Δ5I-4  | 297.21   | 619.51  | 0.48        |
| GGT1-Δ5I-5  | 951.95   | 512.43  | 1.86        |
| GGT1-Δ5I-6  | 334.09   | 174.80  | 1.91        |
| GGT1-Δ5I-7  | 3786.31  | 2521.27 | 1.50        |
| GGT1-Δ5I-8  | 5001.94  | 307.91  | 16.24       |
| GGT1-Δ5I-9  | 1061.36  | 169.21  | 6.27        |
| GGT1-Δ5I-10 | 2302.04  | 459.51  | 5.01        |
| GGT2-1      | 63.35    | 125.83  | 0.50        |
| GGT2-2      | 171.72   | 170.85  | 1.01        |
| GGT2-3      | 5.87     | 11.44   | 0.51        |
| GGT2-4      | 84.71    | 160.76  | 0.53        |
| GGT2-5      | 17.31    | 17.58   | 0.98        |

---

|                    |          |         |       |
|--------------------|----------|---------|-------|
| <i>GGT2-7</i>      | 7.69     | 7.44    | 1.03  |
| <i>GGT2-8</i>      | 7.73     | 9.67    | 0.80  |
| <i>GGT2-9</i>      | 18.63    | 15.79   | 1.18  |
| <i>GGT2-10</i>     | 22.83    | 52.40   | 0.44  |
| <i>GGT2-Δ5I-1</i>  | 3.16     | 1.35    | 2.35  |
| <i>GGT2-Δ5I-3</i>  | 4.05     | 8.24    | 0.49  |
| <i>GGT2-Δ5I-4</i>  | 13.27    | 7.80    | 1.70  |
| <i>GGT2-Δ5I-5</i>  | 1.26     | 3.04    | 0.41  |
| <i>GGT2-Δ5I-6</i>  | 23.13    | 14.40   | 1.61  |
| <i>GGT2-Δ5I-7</i>  | 6.35     | 18.51   | 0.34  |
| <i>GGT2-Δ5I-8</i>  | 1.62     | 8.44    | 0.19  |
| <i>GGT2-Δ5I-9</i>  | 1.30     | 1.48    | 0.88  |
| <i>GGT1 25I-1</i>  | 340.60   | 677.23  | 0.50  |
| <i>GGT1 25I-2</i>  | 1571.02  | 1984.99 | 0.79  |
| <i>GGT1 25I-3</i>  | 4955.78  | 1031.92 | 4.80  |
| <i>GGT1 25I-4</i>  | 6462.45  | 9037.18 | 0.72  |
| <i>GGT1 25I-5</i>  | 3549.35  | 329.69  | 10.77 |
| <i>GGT1 25I-6</i>  | 6312.42  | 4856.22 | 1.30  |
| <i>GGT1 25I-7</i>  | 21740.90 | 4332.06 | 5.02  |
| <i>GGT1 25I-8</i>  | 10417.43 | 5810.84 | 1.79  |
| <i>GGT1 25I-9</i>  | 15544.19 | 9515.55 | 1.63  |
| <i>GGT1 25I-10</i> | 14192.08 | 669.05  | 21.21 |
| <i>GGT2 15I-1</i>  | 876.64   | 254.51  | 3.44  |
| <i>GGT2 15I-2</i>  | 349.72   | 299.93  | 1.17  |
| <i>GGT2 15I-3</i>  | 221.89   | 165.72  | 1.34  |
| <i>GGT2 15I-4</i>  | 189.68   | 1004.09 | 0.19  |
| <i>GGT2 15I-5</i>  | 245.85   | 312.92  | 0.79  |
| <i>GGT2 15I-6</i>  | 635.40   | 42.85   | 14.83 |
| <i>GGT2 15I-7</i>  | 482.73   | 1609.62 | 0.30  |
| <i>GGT2 15I-8</i>  | 571.94   | 451.72  | 1.27  |

---

## Supplemental table S2 – Laxa et al.

**Supplemental table II.** List of primers used for quantitative real-time PCR analysis. For clarity the AGI code of *GAPDH* is given. P1 designates the position 146 bp downstream of ATG on the *gusA* coding sequence used for qPCR analysis after chromatin immunoprecipitation (ChIP). Fw: forward primer, rv: reverse primer, SF: splice form.

| Primer                            | Sequence (5' to 3')       |
|-----------------------------------|---------------------------|
| <i>GAPDH</i> _mRNA_fw (At1g13440) | TTGGTGACAACAGGTCAAGCA     |
| <i>GAPDH</i> _mRNA_rv             | AAACTTGTCGCTCAATGCAATC    |
| <i>GGT1</i> _unspliced RNA_fw     | CGGTAATGGAGATGGGGTAA      |
| <i>GGT1</i> _unspliced _rv        | AGAATCTGCCAAACGGAAA       |
| <i>GGT2</i> _SF1/2_fw             | CTGCTCTGGAACGTGACTTTG     |
| <i>GGT2</i> _SF2_fw               | CGCTATTGCAATAAGCGCCC      |
| <i>GGT2</i> _SF3_fw               | CAATCTTTATGATCGACTCAATAAG |
| <i>GGT2</i> _SF4_fw               | TATCGTTTGAGACTGTTCTGTAG   |
| <i>GGT2</i> _5'UTR_rv             | CTAAAAGCAAATGATTCCTCAC    |
| <i>GusA</i> _ChIP_fw (P1)         | CTGTGGAATTGGTCAGCGTTG     |
| <i>GusA</i> _ChIP_rv (P1)         | CAGACGTTGCCCGCATAATTAC    |
| <i>GusA</i> _unspliced RNA_fw     | GTTGATGTGCAGGTATCACCG     |
| <i>GusA</i> _unspliced RNA_rv     | TTGCCGTTTTTCGTCCGGTAATC   |
| <i>GusA</i> _mRNA_fw              | GAAGCCGATGTCACGCCG        |
| <i>GusA</i> _mRNA_rv              | TTGCCGTTTTTCGTCCGGTAATC   |
| <i>NptII</i> _mRNA_fw             | CTGTCCGGTGCCCTGAATG       |
| <i>NptII</i> _mRNA_rv             | CAACGTCCGAGCACAGCTGC      |

## Supplemental table S3 – Laxa et al.

**Supplemental table III.** Primer used for the amplification of the *promoter::gusA* constructs used in this study. Besides the primer name and nucleotide sequences the table includes information on the relative position of the primer to the transcription initiation start (TIS), specific numbering for the overlap extension (OE) PCR (P1-P6; scheme available in Supplemental figure S10). Underlined nucleotide sequences (solid line) mark overlapping regions that were added for the OE PCR to generate of both *GGT1* 25I and *GGT2* 15I, respectively. Underlined nucleotide sequences (dashed line) mark the multiple cloning site introduced downstream of the 5'UTRs of *CAT3* (At1g26020), *GLDP1-P2* (At4g33010, Adwy et al., 2015) and a root-specific peroxidase (*PRX*, At3g01190). Underlined nucleotide sequences (dotted line) mark the restriction sites that have been introduced 5' and 3' of the *GGT1* 5'UTR intron, respectively. Fw: forward primer, rv: reverse primer.

| Position relative to TIS                 | Primer                | Sequence (5' to 3')                                                                  |
|------------------------------------------|-----------------------|--------------------------------------------------------------------------------------|
|                                          | 35S_fw                | CACCGGTCCAAGACCAGAGGGC                                                               |
|                                          | 35S_rv                | TGTCCTCTCAAATGAAATGAAC                                                               |
| -1458                                    | <i>GGT1</i> _-1458_fw | CACCTAAAGCATTATTCAGTAGTATGTG                                                         |
| -1122                                    | <i>GGT1</i> _-1122_fw | CACCCGGCTGAGAACTTGCATGAA                                                             |
| -684                                     | <i>GGT1</i> _-684_fw  | CACCCGGACAATAAATCGCTACAGAC                                                           |
| -157                                     | <i>GGT1</i> _-157_fw  | CACCCCTATTGGTCATGTTCCAAACG                                                           |
|                                          | <i>GGT1</i> _5'UTR_rv | TTATGTTCACTCTGAACCAAT                                                                |
|                                          | <i>GGT1</i> _Δ5I_rv   | TTATGTTCACTCTGAACCAATCCCTAGCTCACTTCTCCCTC<br>CTCTTCAAACCTCAATGTTGTGACTC              |
| -347                                     | <i>GGT2</i> _-347_fw  | CACCATTTTGCACATTCATGTTACTTAAT                                                        |
|                                          | <i>GGT2</i> _5'UTR_rv | TTCCAGGATTTACTTTTCAAAGC                                                              |
|                                          | <i>GGT2</i> _Δ5I_rv   | TTCCAGGATTTACTTTTCAAAGCTAAAAGCAAAATGATTCCTCA<br>CTTCCCCCTTAGATCAAACCTCACGACAC        |
| Overlap extension primer <i>Ggt1</i> 25I | Primer                | Sequence (5' to 3')                                                                  |
| P1                                       | <i>GGT1</i> _-1458_fw | CACCTAAAGCATTATTCAGTAGTATGTG                                                         |
| P6                                       | <i>GGT1</i> _5'UTR_rv | TTATGTTCACTCTGAACCAAT                                                                |
| P2                                       | <i>GGT1</i> _P2_rv    | <u>AGAAATTATACCAACCTTCAAACCTCAATGTTGTGACTC</u>                                       |
| P3                                       | <i>GGT2</i> _5I_fw    | <u>ACATTGAGTTTGAAGGTTGGTATAATTTCTGTAGTTTTG</u>                                       |
| P4                                       | <i>GGT2</i> _5I_rv    | <u>CACTTCTTCCCTCCTTCTACAACCAAAATAAGCAGATG</u>                                        |
| P5                                       | <i>GGT1</i> _P5_fw    | <u>TATTTTGGTTGTAGAGGAGGGAAGAAGTGAGCTAGGGATTGGT</u><br>TCAGAGTGAACATAACCTAAGGGTGGGCGC |

|                                             |                                    |                                                                                               |
|---------------------------------------------|------------------------------------|-----------------------------------------------------------------------------------------------|
| P5                                          | <i>GGT1_P5_rv</i>                  | GCGCCCACCCTTAGGTTATGTTCACTCTGAACCAATCCCTAGC<br>TCACTTCTTCCCTCCTT <u>CTACAACCAAAATA</u>        |
| Overlap extension<br>primer <i>Ggt2</i> 15l | Primer                             | Sequence (5' to 3')                                                                           |
| P1                                          | <i>GGT2_-347_fw</i>                | CACCATTTTGCACATTCATGTTACTTAAT                                                                 |
| P6                                          | <i>GGT2_5'UTR_rv</i>               | TTCCAGGATTTACTTTTCAAAGC                                                                       |
| P2                                          | <i>GGT2_P2_rv</i>                  | <u>AACCAAATCACAAAC</u> CTTAGATCAACTCACGACACA                                                  |
| P3                                          | <i>GGT1_5l_fw</i>                  | <u>GTGAGTTGATCTAAG</u> GTTTGTGATTTGGTTTTCTTTCTC                                               |
| P4                                          | <i>GGT1_5l_rv</i>                  | <u>ATTCCTCACTTCCCC</u> CTACAATTGGAAGAAAACAATTCATC                                             |
| P5                                          | <i>GGT2_P5_fw</i>                  | <u>TTCTCCAATTGTAGAGGGGAAGTGAGGAATC</u> ATTTTGCTTTTA<br>GCTTTGAAAAGTAAATCCTGGAACCTAAGGGTGGGCGC |
| P5                                          | <i>GGT2_P5_rv</i>                  | GCGCCCACCCTTAGGTTCCAGGATTTACTTTTCAAAGCTAAAA<br>GCAAAATGATTCCTCACTT <u>CCCCCTACAATTGGAAGAA</u> |
| Promoter 15l<br>constructs                  | Primer                             | Sequence (5' to 3')                                                                           |
|                                             | <i>GGT1</i> 5l<br><i>Acc65l_fw</i> | <u>AAAAAGGTACC</u> GTTTGTGATTTGGTTTTCTTTC                                                     |
|                                             | <i>GGT1</i> 5l <i>BglII_rv</i>     | <u>AAAAAAGATCT</u> CTACAATTGGAAGAAAACAATTC                                                    |
|                                             | <i>GLDP1-P2_fw</i>                 | CACCTATGTCCCATTAGAGGGGAA                                                                      |
|                                             | <i>GLDP1_MCS_rv</i>                | <u>AGGCCTGTCAGTAGATCTGTCAGTGGTACC</u> TGGGAAAAAAGGT<br>TGCAGTC                                |
|                                             | <i>CAT3_fw</i>                     | CACCCGAGAATATTATCACACAAC                                                                      |
|                                             | <i>CAT3_rv</i>                     | GGTGATGATAGAAGGTTGATG                                                                         |
|                                             | <i>CAT3_MCS_rv</i>                 | <u>GTCGACGTCAGTGGTACC</u> GGTGATGATAGAAGGTTGATG                                               |
|                                             | <i>PRX_fw</i>                      | CACCTCTATTTTACTCTTTCTATTCCG                                                                   |
|                                             | <i>PRX_rv</i>                      | TTTCTTAAAAAATCTTTAGTTTGTTC                                                                    |
|                                             | <i>PRX_MCS_rv</i>                  | <u>GTCGACGTCAGTGGTACC</u> TTTCTTAAAAAATCTTTAGTTTGTTC<br>C                                     |

## Supplemental table S4 – Laxa et al.

**Supplemental table IV.** Segregation analysis of *GGT1*  $\Delta 5l::gusA$  transgenic lines (F2-generation) used to generate the data in Figure 4 and 5. The table summarizes the number of individuals analyzed per transgenic event, the number of kanamycin-sensitive and insensitive plants as well as the expected numbers according to mendelian segregation. Additionally, transcript levels of *gusA* mRNA (standardized to *GAPDH*) were added to correlate *gusA* expression to the probability of a single insertion indicated by the  $\chi^2$ -test.

| Event                      | Individuals | insensitive | sensitive | expected insensitive | expected sensitive | <i>gusA</i> mRNA/<br><i>GAPDH</i> | $\chi^2$ -test |
|----------------------------|-------------|-------------|-----------|----------------------|--------------------|-----------------------------------|----------------|
| <i>GGT1</i> $\Delta 5l$ -1 | 49          | 39          | 10        | 36.75                | 12.25              | 0.299                             | 0.46           |
| <i>GGT1</i> $\Delta 5l$ -2 | 50          | 46          | 4         | 37.5                 | 12.5               | 0.814                             | 0.01           |
| <i>GGT1</i> $\Delta 5l$ -3 | 49          | 40          | 9         | 36.75                | 12.25              | 0.764                             | 0.28           |
| <i>GGT1</i> $\Delta 5l$ -4 | 47          | 39          | 8         | 35.25                | 11.75              | 0.026                             | 0.21           |
| <i>GGT1</i> $\Delta 5l$ -5 | 51          | 35          | 16        | 38.25                | 12.75              | 0.067                             | 0.29           |
| <i>GGT1</i> $\Delta 5l$ -6 | 50          | 33          | 17        | 37.5                 | 12.5               | 0.046                             | 0.14           |
| <i>GGT1</i> $\Delta 5l$ -7 | 51          | 40          | 11        | 38.25                | 12.75              | 0.493                             | 0.57           |
| <i>GGT1</i> $\Delta 5l$ -8 | 53          | 38          | 15        | 39.75                | 13.25              | 0.264                             | 0.58           |
| <i>GGT1</i> $\Delta 5l$ -9 | 50          | 36          | 14        | 37.5                 | 12.5               | 0.044                             | 0.62           |
